# Supplementary material for: A DNA Repair and Cell Cycle Gene Expression Signature in Pediatric High-Grade Gliomas: Prognostic and Therapeutic Value
Source: MDPI journal article supplement (doi:10.3390/cancers13092252), 2021-05-07

**Supplementary Figure 1.** Adult glioblastoma (aGBM) signatures. Lists and description of the genes composing the 52 DNA repair and cell-cycle gene expression signature identified in aGBMs as well as its refined 27-gene signature.

|                                                                                                                                                                                                                                                                                                                                                                                                                                                                                                          |                                                                                                                                                                                                                                               |                                                                                                                                                                                                                                                                                                                                                                                                                                                                        |                                                                                                                                                                                                                                                                                                                                                                |
|----------------------------------------------------------------------------------------------------------------------------------------------------------------------------------------------------------------------------------------------------------------------------------------------------------------------------------------------------------------------------------------------------------------------------------------------------------------------------------------------------------|-----------------------------------------------------------------------------------------------------------------------------------------------------------------------------------------------------------------------------------------------|------------------------------------------------------------------------------------------------------------------------------------------------------------------------------------------------------------------------------------------------------------------------------------------------------------------------------------------------------------------------------------------------------------------------------------------------------------------------|----------------------------------------------------------------------------------------------------------------------------------------------------------------------------------------------------------------------------------------------------------------------------------------------------------------------------------------------------------------|
| <b>A</b> <div> <u><b>AURKA</b></u><br/> AURKB<br/> <u><b>CDC25C</b></u><br/> CDC6<br/> <u><b>CCNB1</b></u><br/> CCNA2<br/> <u><b>CDK1</b></u><br/> CENPA<br/> CENPF<br/> <u><b>KIAA0101</b></u><br/> MKI67<br/> MAD2L2<br/> PLK1<br/> <u><b>PTTG1</b></u><br/> <u><b>TOP2A</b></u><br/> POLK<br/> POLM<br/> POLQ<br/> POLD1<br/> REV1<br/> RFC1<br/> EME1<br/> MUS81<br/> BRCA2<br/> HMMR<br/> MRE11A<br/> PALB2<br/> RAD17<br/> <u><b>RAD51</b></u><br/> RAD54B<br/> RAD54L<br/> RAD50<br/> RPA2 </div> | <div> DDB2<br/> ERCC3<br/> ERCC4<br/> XPA<br/> XPC<br/> NEIL1<br/> NEIL2<br/> NEIL3<br/> UBE3B<br/> <u><b>UBE2T</b></u><br/> UBE3B<br/> <u><b>FANCD2</b></u><br/> FANCF<br/> ATR<br/> MSH3<br/> PMS1<br/> RECQL5<br/> SMUG1<br/> NUDT1 </div> | <b>B</b> <div> <u><b>AURKA</b></u><br/> AURKB<br/> <u><b>CDC25C</b></u><br/> CDC6<br/> <u><b>CCNB1</b></u><br/> CCNA2<br/> <u><b>CDK1</b></u><br/> CENPA<br/> CENPF<br/> <u><b>KIAA0101</b></u><br/> MKI67<br/> PLK1<br/> <u><b>PTTG1</b></u><br/> <u><b>TOP2A</b></u><br/> POLM<br/> POLQ<br/> EME1<br/> MUS81<br/> <u><b>RAD51</b></u><br/> RAD54B<br/> RAD54L<br/> ERCC3<br/> ERCC4<br/> NEIL3<br/> <u><b>UBE2T</b></u><br/> UBE3B<br/> <u><b>FANCD2</b></u> </div> | <div> effectors and regulators of cell cycle<br/> cell cycle and DDR<br/> coordination of DDR<br/> DNA polymerases in NHEJ and DSB<br/> Holliday junction recombination<br/> HR<br/> single-stranded DNA break repair<br/> double-stranded DNA break repair<br/> NER<br/> NHEJ and NER<br/> Fanconi anemia<br/> MMR (MisMatch excision repair)<br/> BER </div> |
|----------------------------------------------------------------------------------------------------------------------------------------------------------------------------------------------------------------------------------------------------------------------------------------------------------------------------------------------------------------------------------------------------------------------------------------------------------------------------------------------------------|-----------------------------------------------------------------------------------------------------------------------------------------------------------------------------------------------------------------------------------------------|------------------------------------------------------------------------------------------------------------------------------------------------------------------------------------------------------------------------------------------------------------------------------------------------------------------------------------------------------------------------------------------------------------------------------------------------------------------------|----------------------------------------------------------------------------------------------------------------------------------------------------------------------------------------------------------------------------------------------------------------------------------------------------------------------------------------------------------------|

**Supplementary Figure 2. (A).** Heatmap of hierarchical clustering in the DIPG cohort based on the 27-gene aGBM signature. Illustrated is the lack of segregation of H3.1 and H3.3 tumors in separate groups based on the DNA damage repair and cell cycle gene expression signature. **(B-C)** ICA (Independent Component Analysis) of the cell cycle component in the DIPG cohort. Weight of the cell-cycle component from ICA of the DIPGs **(B)** showed no linkage with mutations in H3.1 K27M and H3.3. K27M specimens **(C)**.

**A**

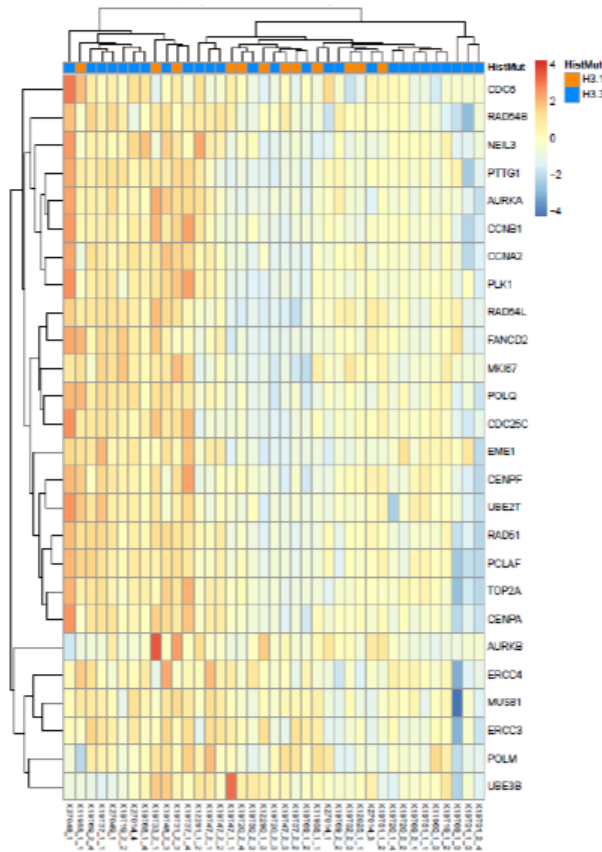

**B**

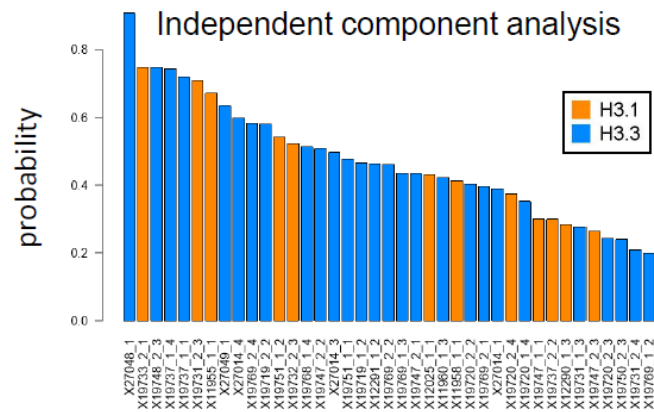

**C**

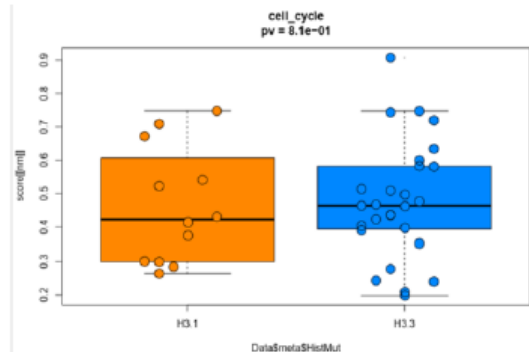

**Supplementary Figure 3.** Heatmap of hierarchical clustering in the sus-tentorial pHGG cohort based on the aGBM signature. Illustrated is the partial segregation of pHGG specimens into 2 groups based on the 27 DNA damage repair and cell cycle gene expression signature.

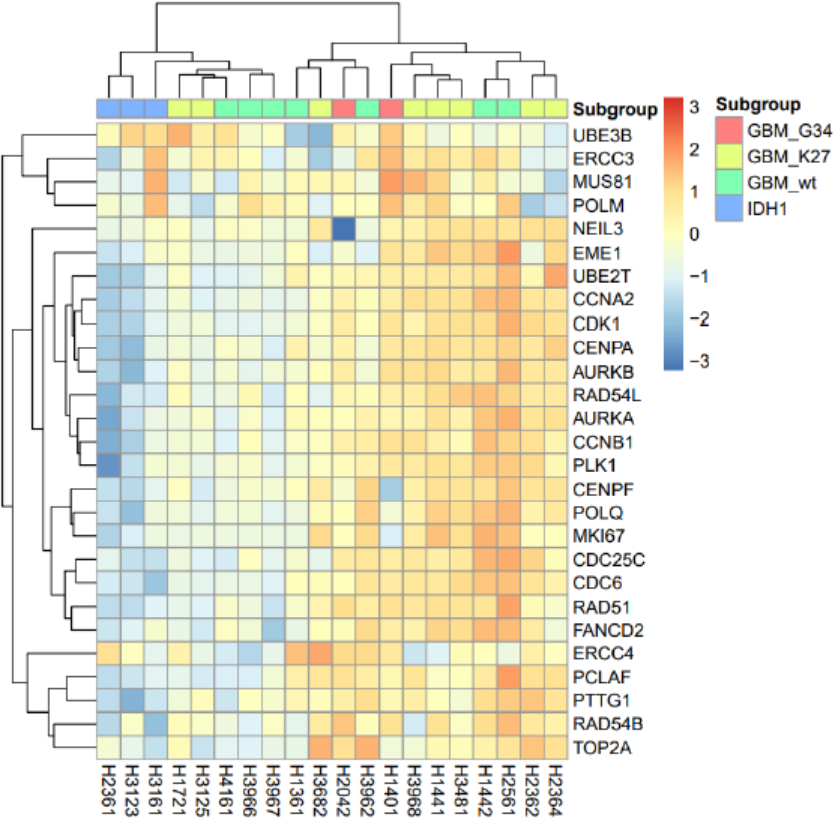

**Supplementary Figure 4.** Heatmap illustrating the partial segregation of DIPG specimens from a cohort containing H3.1 K27M and H3.3 K27M mutant samples based on the specific pHGG 28-DDR signature.

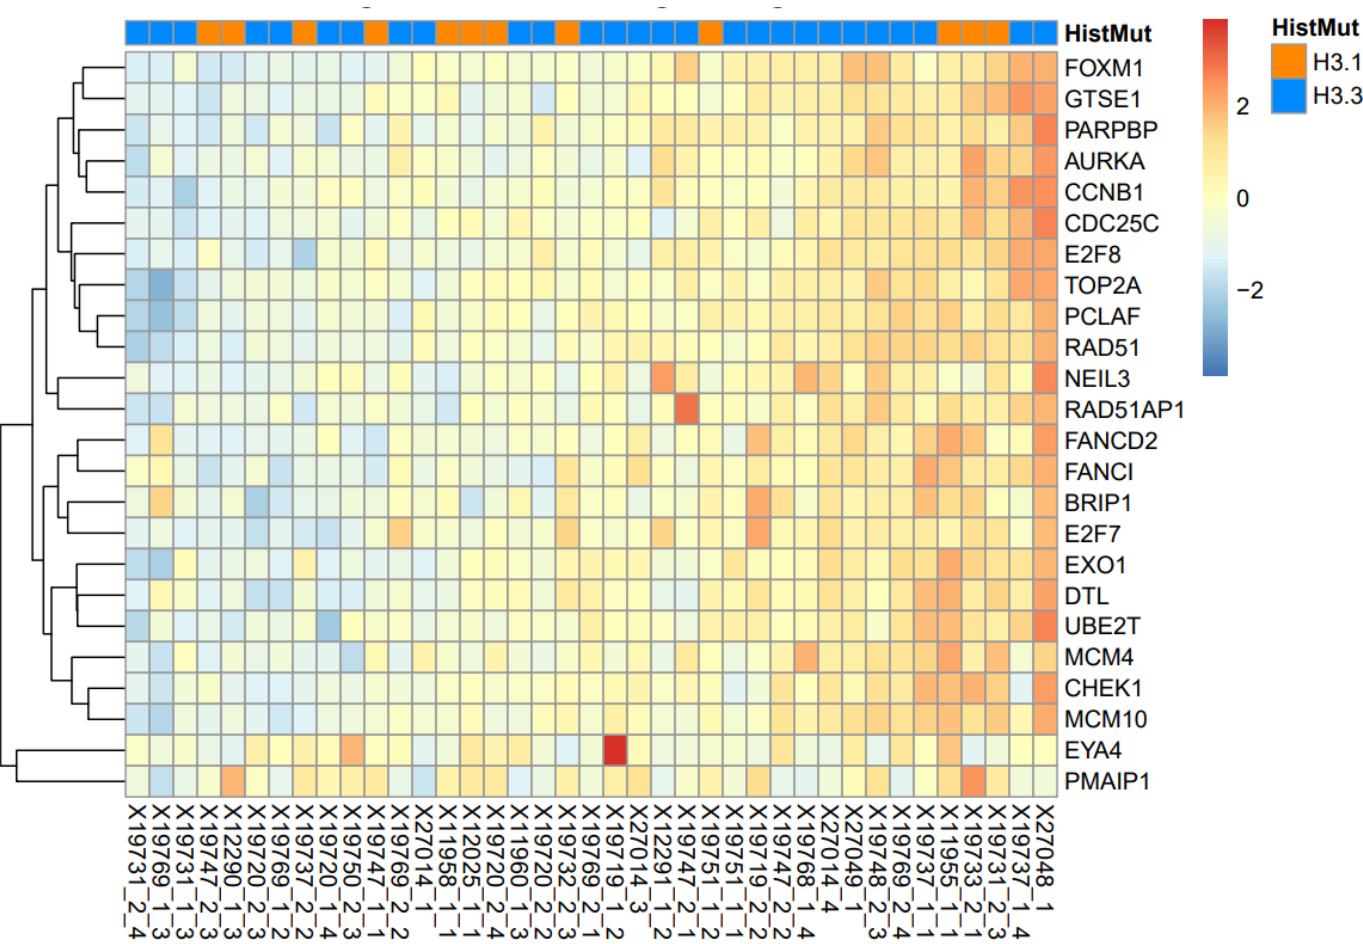

**Supplementary Figure 5.** Immunohistochemical analyses. Illustration of TMA HE slides and immunostainings on left side. Examples of PARP1, XRCC1, KI67, RAD51, MPG and APE positive immunostainings on right side (x40).

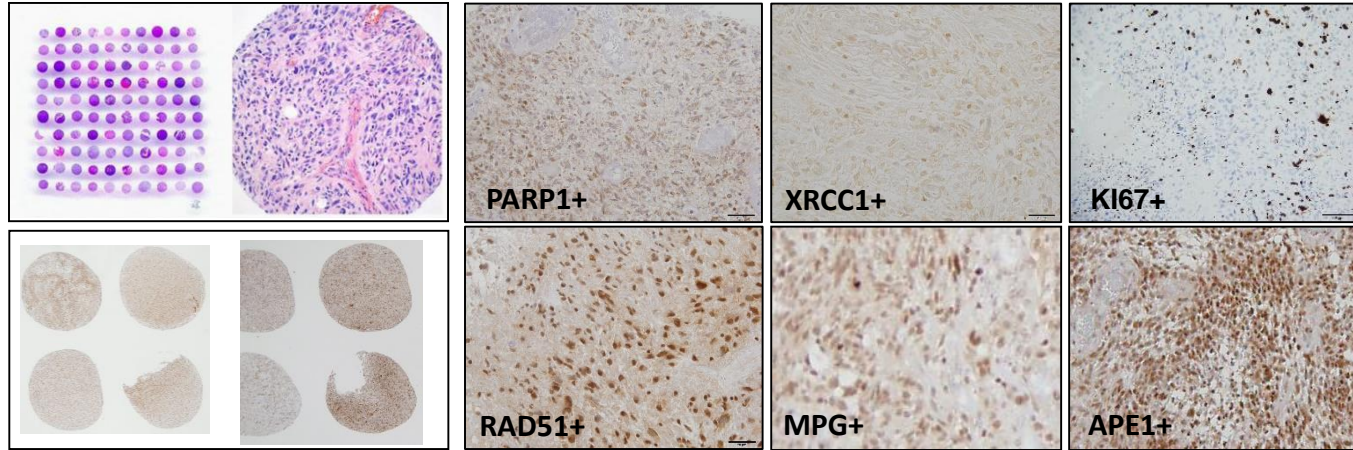

Supplement: s1 [file s1]
